# Supplementary material for: Osmostress enhances activating phosphorylation of Hog1 MAP kinase by mono‐phosphorylated Pbs2 MAP2K
Source: PubMed Central journal article supplement (PMC7049814; doi:10.15252/embj.2019103444), 2020-02-03
Supplement: EMBJ-39-e103444-s001.pdf [file EMBJ-39-e103444-s001.pdf]

## Appendix

### **Osmostress enhances the activating phosphorylation of MAPK Hog1 by mono-phosphorylated MAP2K Pbs2**

**Kazuo Tatebayashi<sup>1,2,3\*</sup>, Katsuyoshi Yamamoto<sup>2</sup>, Taichiro Tomida<sup>4</sup>, Akiko Nishimura<sup>2,3</sup>,  
Tomomi Takayama<sup>2,3</sup>, Masaaki Oyama<sup>5</sup>, Hiroko Kozuka-Hata<sup>5</sup>, Satomi  
Adachi-Akahane<sup>4</sup>, Yuji Tokunaga<sup>6</sup>, and Haruo Saito<sup>2\*</sup>**

<sup>1</sup>Laboratory of Molecular Genetics, Frontier Research Unit, Institute of Medical Science,  
The University of Tokyo, Tokyo 108-8639, Japan.

<sup>2</sup>Division of Molecular Cell Signaling, Institute of Medical Science,  
The University of Tokyo, Tokyo 108-8639, Japan.

<sup>3</sup>Department of Biological Sciences, Graduate School of Science,  
The University of Tokyo, Tokyo 113-0033, Japan.

<sup>4</sup>Department of Physiology, School of Medicine, Faculty of Medicine,  
Toho University, Tokyo 143-8540, Japan.

<sup>5</sup>Medical Proteomics Laboratory, Institute of Medical Science,  
The University of Tokyo, Tokyo 108-8639, Japan.

<sup>6</sup>Molecular Profiling Research Center for Drug Discovery, National Institute of Advanced  
Industrial Science and Technology, Tokyo 135-0064, Japan

**NaCl**

| Molarity (M) | $x_w$  | $\gamma_w$ | $a_w$  | $\Pi$ (MPa) |
|--------------|--------|------------|--------|-------------|
| 0.2          | 0.9928 | 1.0008     | 0.9936 | 0.89        |
| 0.3          | 0.9892 | 1.0010     | 0.9902 | 1.35        |
| 0.4          | 0.9856 | 1.0013     | 0.9869 | 1.81        |
| 0.6          | 0.9785 | 1.0017     | 0.9802 | 2.76        |
| 0.8          | 0.9715 | 1.0019     | 0.9734 | 3.72        |
| 1.0          | 0.9645 | 1.0020     | 0.9664 | 4.70        |
| 1.2          | 0.9575 | 1.0019     | 0.9593 | 5.71        |
| 1.4          | 0.9506 | 1.0016     | 0.9521 | 6.75        |
| 1.6          | 0.9437 | 1.0011     | 0.9447 | 7.83        |
| 1.8          | 0.9369 | 1.0002     | 0.9371 | 8.94        |

**Sorbitol**

| Molarity (M) | $x_w$  | $\gamma_w$ | $a_w$  | $\Pi$ (MPa) |
|--------------|--------|------------|--------|-------------|
| 0.4          | 0.9925 | 0.9998     | 0.9922 | 1.07        |
| 0.8          | 0.9842 | 0.9995     | 0.9838 | 2.25        |
| 1.2          | 0.9751 | 0.9990     | 0.9741 | 3.61        |
| 1.6          | 0.9654 | 0.9981     | 0.9636 | 5.11        |
| 2.0          | 0.9543 | 0.9966     | 0.9510 | 6.91        |
| 2.4          | 0.9422 | 0.9941     | 0.9367 | 9.01        |

**Appendix Figure S1. Conversion of NaCl and sorbitol solute concentration (molarity, M) to osmotic pressure (MPa).**

Osmotic pressure was calculated according to the following formulas.

$$\Pi = -(RT/V_w) \ln(a_w)$$

$$a_w = \gamma_w x_w$$

where  $\Pi$  is osmotic pressure (Pascal);  $R$  is the Gas constant ( $8.3145 \text{ J K}^{-1} \text{ mol}^{-1}$ );  $T$  is the absolute temperature ( $298.15 \text{ K}$  at  $25 \text{ }^\circ\text{C}$ );  $V_w$  is the molar volume of  $\text{H}_2\text{O}$  ( $18.01 \text{ cm}^3$ );  $a_w$  is water activity of the solution (*i.e.*, chemical potential of the solvent water);  $\gamma_w$  is the activity coefficient of the solvent water; and  $x_w$  is the mole fraction of the solvent water.  $x_w$ ,  $\gamma_w$  and/or  $a_w$  were obtained by interpolation of the data in the literature (Comesaña *et al.*, 2001, Fontana Jr, 2007, Koohyar *et al.*, 2013, Ninni *et al.*, 2000, Zhang & Han, 1996).

## References

- Comesaña JF, Correa A, Sereno AM (2001) Water activity in sorbitol or xylitol + water and sorbitol or xylitol + sodium chloride + water systems at 20°C and 35°C. *J Chem Eng Data* 46: 716-719
- Fontana Jr AJ (2007) Water activity of unsaturated salt solutions at 25°C. In Water activity in foods: Fundamentals and applications, Barbosa-Cánovas GV, Fontana Jr AJ, Schmidt SJ, Labuza TP (eds) pp 395-397.
- Koohyar F, Rostami AA, Chaichi MJ, Kiani F (2013) Study on thermodynamic properties for binary systems of water + L-cysteine hydrochloride monohydrate, glycerol, and D-sorbitol at various temperatures. *J Chemistry* 2013: ID 601751
- Ninni L, Camargo MS, Meirelles AJA (2000) Water activity in polyol systems. *J Chem Eng Data* 45: 654-660
- Zhang HL, Han SJ (1996) Viscosity and density of water + sodium chloride + potassium chloride solutions at 298.15 K. *J Chem Eng Data* 41: 516-520
