# Supplementary material for: Osmostress enhances activating phosphorylation of Hog1 MAP kinase by mono‐phosphorylated Pbs2 MAP2K
Source: PubMed Central journal article supplement (PMC7049814; doi:10.15252/embj.2019103444), 2020-02-03

# Source Data Figure 1

1B

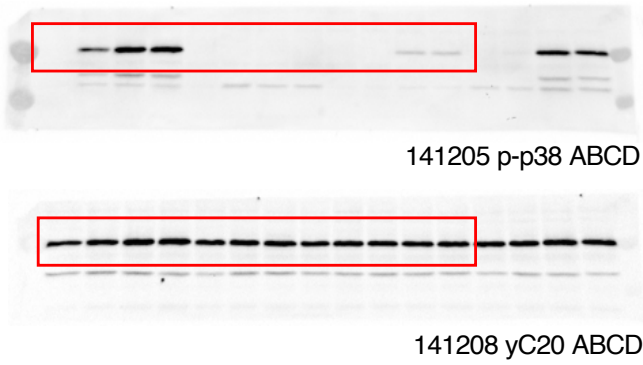

1E

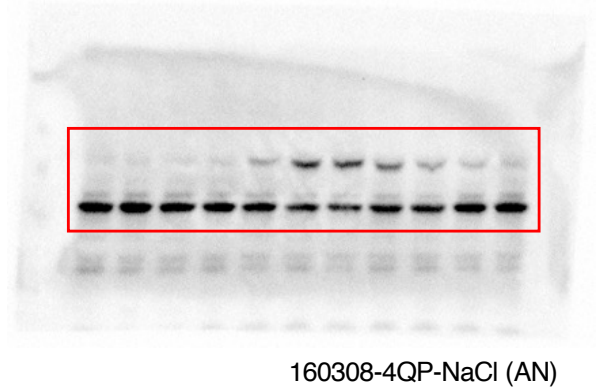

1C

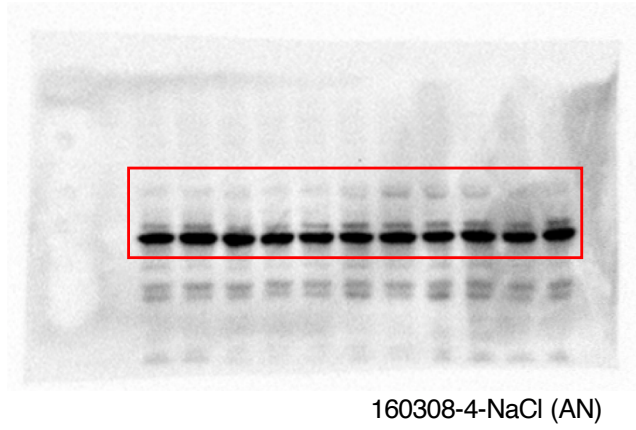

1F

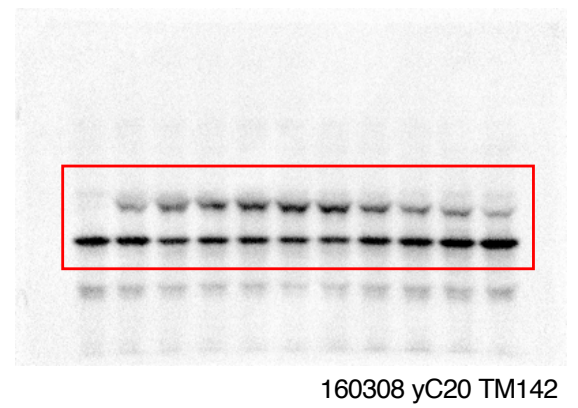

1D

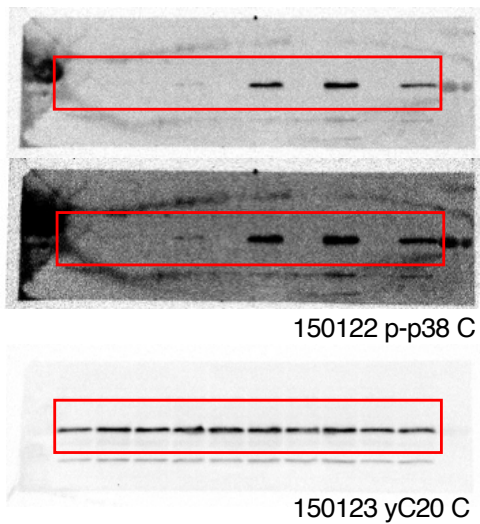

1G

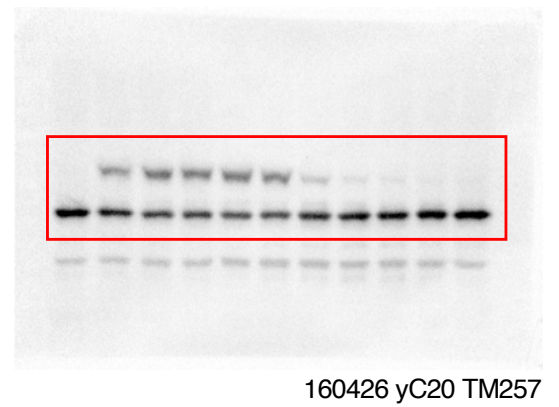

1H

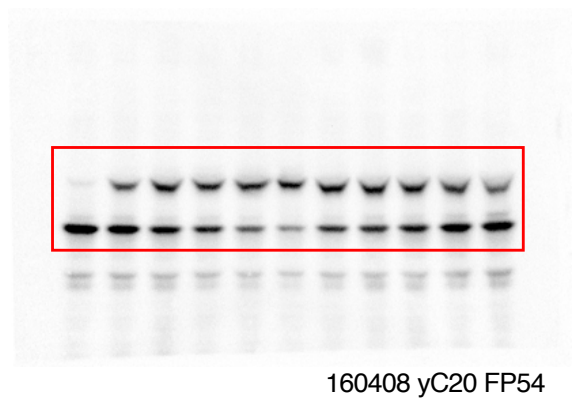

Supplement: EMBJ-39-e103444-s003.pdf [file EMBJ-39-e103444-s003.pdf]
