# Supplementary material for: Osmostress enhances activating phosphorylation of Hog1 MAP kinase by mono‐phosphorylated Pbs2 MAP2K
Source: PubMed Central journal article supplement (PMC7049814; doi:10.15252/embj.2019103444), 2020-02-03
Supplement: EMBJ-39-e103444-s004.pdf [file EMBJ-39-e103444-s004.pdf]

## Source Data Figure 2

2A

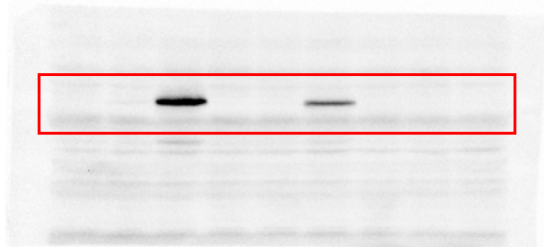

160318 p-p38 a

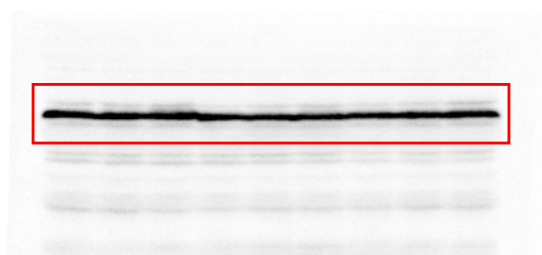

160318 yC20 a

2B

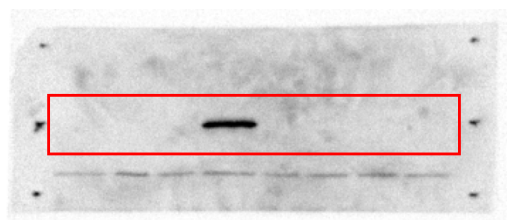

151215 p-p38 g

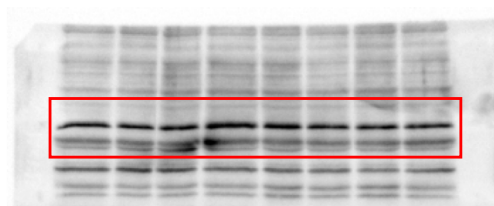

151215 yC20 g

2C

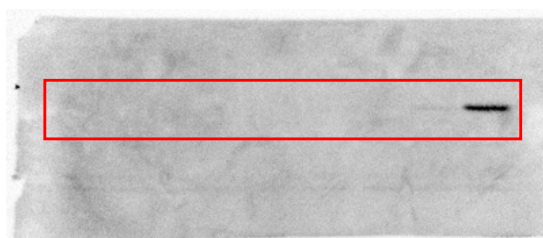

160120 p-p38 k

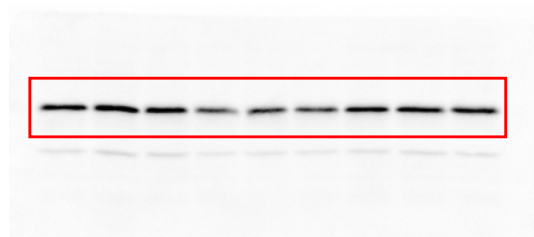

160120 yC20 k

2D

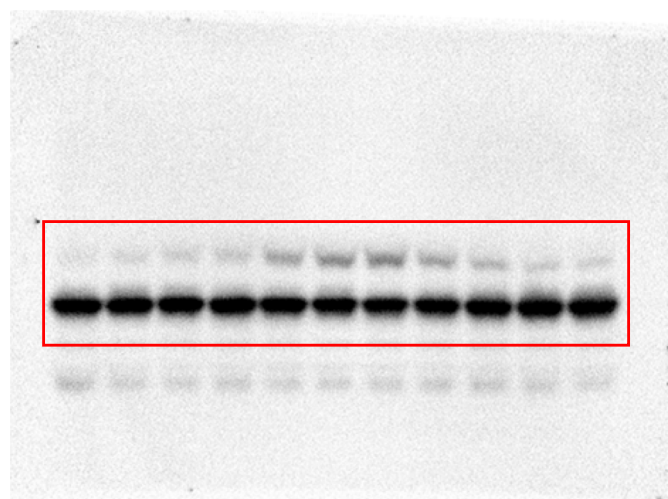

180216 NaCl Phos-tag(yC20)
