# Supplementary material for: Osmostress enhances activating phosphorylation of Hog1 MAP kinase by mono‐phosphorylated Pbs2 MAP2K
Source: PubMed Central journal article supplement (PMC7049814; doi:10.15252/embj.2019103444), 2020-02-03
Supplement: EMBJ-39-e103444-s005.pdf [file EMBJ-39-e103444-s005.pdf]

## Source Data Figure 3

3A

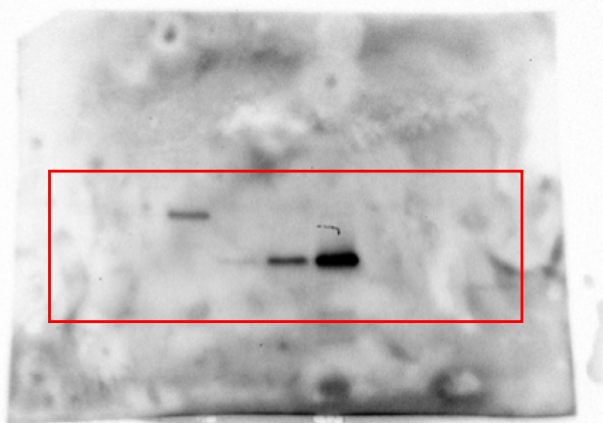

190411 E1-3 IP p-p38(9211S)

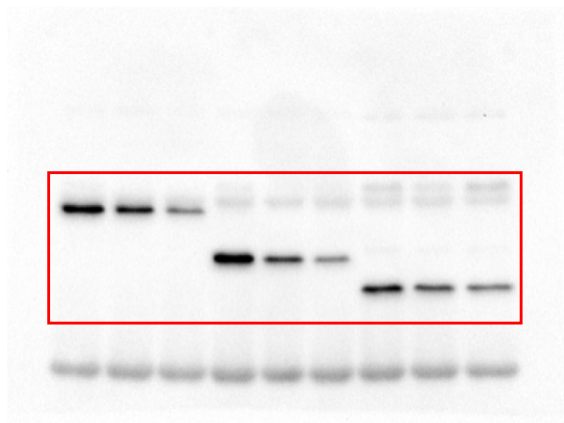

190411 E1-3 IP reblot FLAG(M2)

3D

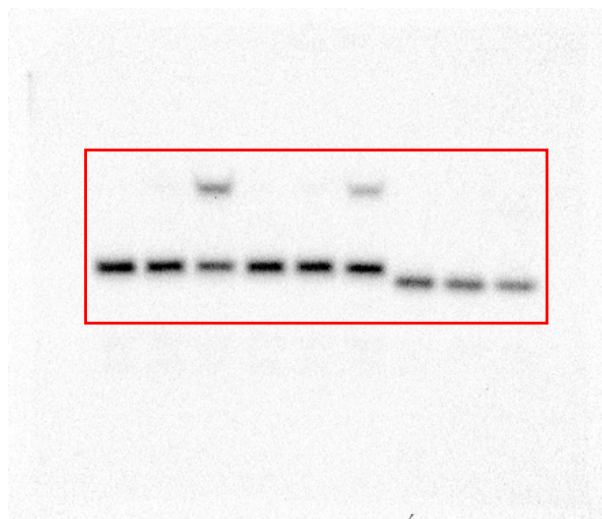

181228 n Phos-tag Hog1(yC20)

3F

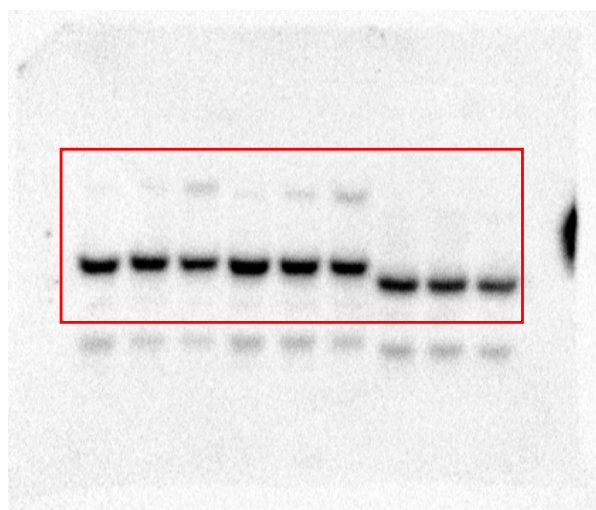

190409 F4-6,1 Phos-tag Hog1(yC20)
