# Supplementary material for: Osmostress enhances activating phosphorylation of Hog1 MAP kinase by mono‐phosphorylated Pbs2 MAP2K
Source: PubMed Central journal article supplement (PMC7049814; doi:10.15252/embj.2019103444), 2020-02-03
Supplement: EMBJ-39-e103444-s006.pdf [file EMBJ-39-e103444-s006.pdf]

# Source Data Figure 4

4A

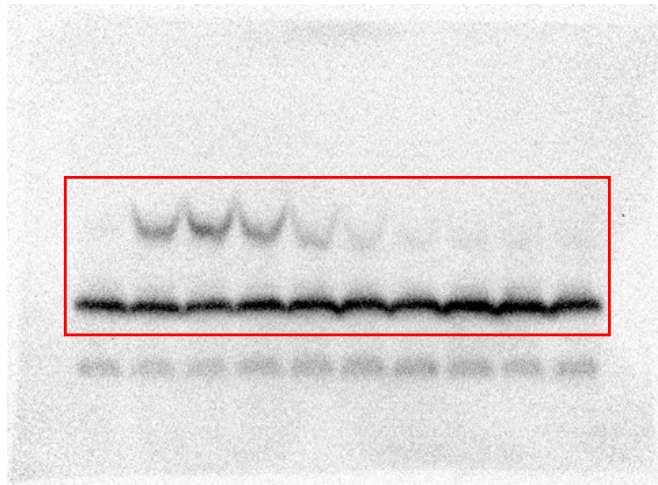

191108 A1-BK Phos-Tag Hog1(yC20)

4C

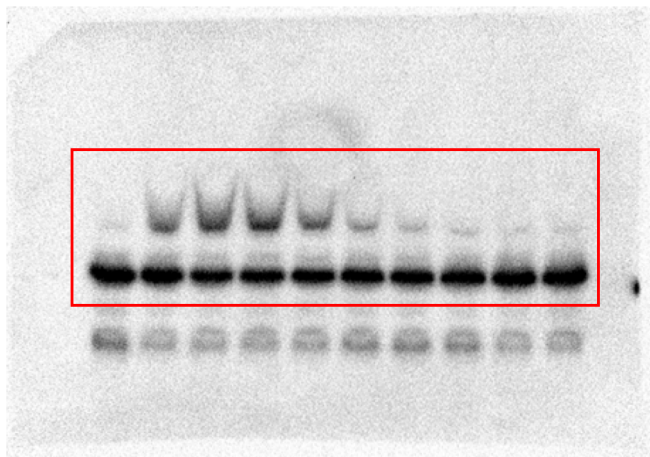

190131 I3 Phos-tag Hog1(yC20)

4E

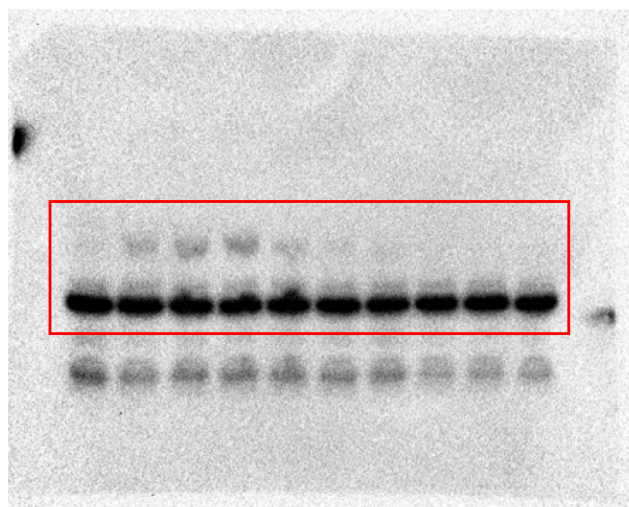

190131 k3 Phos-tag Hog1(yC20)
