# Supplementary material for: Osmostress enhances activating phosphorylation of Hog1 MAP kinase by mono‐phosphorylated Pbs2 MAP2K
Source: PubMed Central journal article supplement (PMC7049814; doi:10.15252/embj.2019103444), 2020-02-03
Supplement: EMBJ-39-e103444-s010.pdf [file EMBJ-39-e103444-s010.pdf]

## Source Data Figure 8

8A

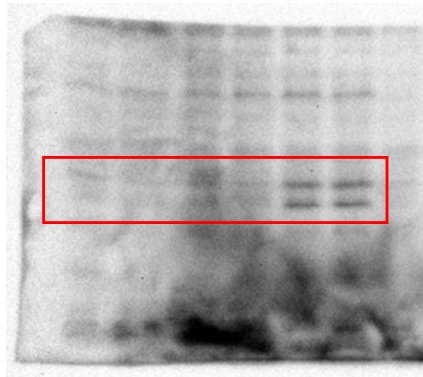

190712 KT299 p-p44 42

8B

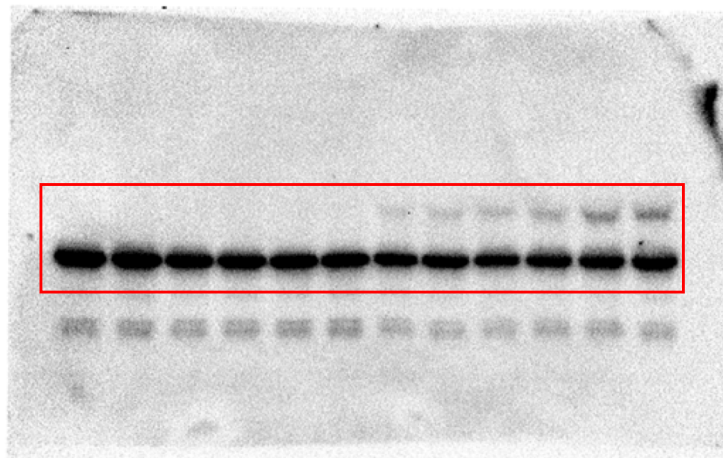

190710 KT299 Phos-tag Hog1(yC20)
