# Supplementary material for: Osmostress enhances activating phosphorylation of Hog1 MAP kinase by mono‐phosphorylated Pbs2 MAP2K
Source: PubMed Central journal article supplement (PMC7049814; doi:10.15252/embj.2019103444), 2020-02-03
Supplement: EMBJ-39-e103444-s011.pdf [file EMBJ-39-e103444-s011.pdf]

# Source Data Figure 9

9A

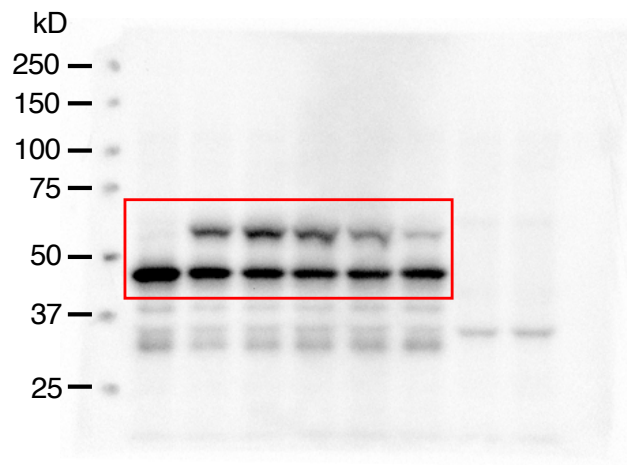

151230 yC20 KY603-3 1M
